# Supplementary material for: Nanoclay-reinforced alginate aerogels: preparation and properties
Source: Royal Society of Chemistry journal article supplement (doi:10.1039/d3ra07132d), 2024-01-01
Supplement: d3ra07132d1.pdf [file d3ra07132d1.pdf]

## Supplementary materials to:

### Nanoclay-reinforced Alginate Aerogels: Preparation and properties.

Bang-Ting Xu<sup>a</sup>, Dazhi Jin<sup>\*,a,b</sup>,

---

<sup>a</sup> School Laboratory of Medicine, Hangzhou Medical College, Hangzhou, 310063 · P. R. China

<sup>b</sup> Institute for Frontier Materials, Deakin University, Geelong, Victoria 3217, Australia

Yi Yu<sup>a</sup>, Qi Zhang<sup>a</sup>, Weng-jie Weng<sup>a</sup>, Kai-xiang Ren<sup>a</sup>, Yu-Lei Tai<sup>\*,a,b</sup>

<sup>c</sup> Laboratory of Biomarkers and In Vitro Diagnosis Translation of Zhejiang Province, Hangzhou, Zhejiang, 310063 · P. R. China

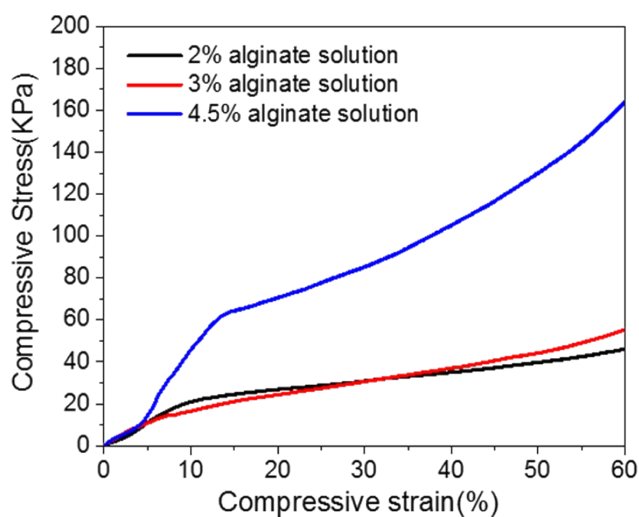

Fig. S1. Effect of the alginate concentration on mechanical properties of the alginate-nanoclay aerogel.

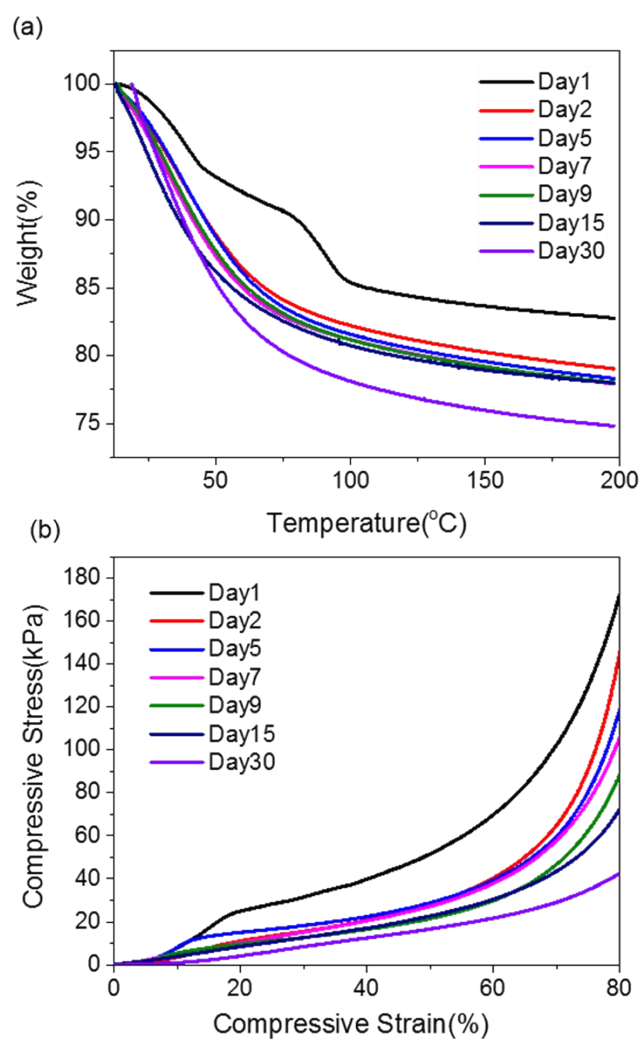

Fig. S2. Effects of the moisture content on mechanical properties of algininate-nanoclay aerogels (a) TGA curves and (b) Compressive stress-strain curves.

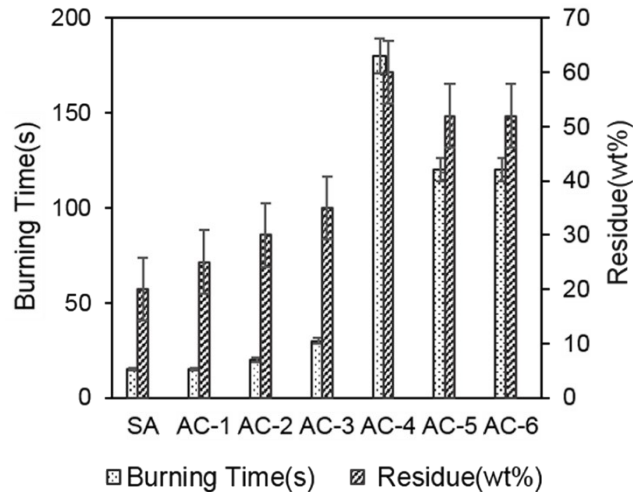

Fig. S3. Burning time measured from butane flame test and residue amount at the end of test. For AC-4 aerogel, a burning time of 180 s, which is the maximal duration of burning test of this work, is given, but this aerogel did not collapse even after a longer exposure to flame.

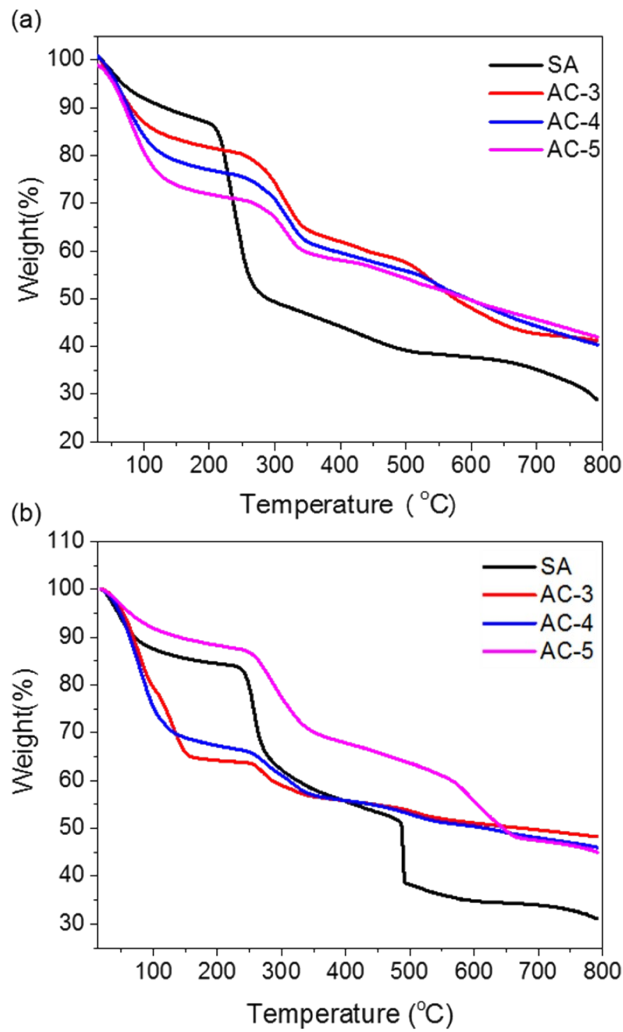

Fig. S4. TGA curves of SA and AC aerogels in Argon (a) and Air (b).

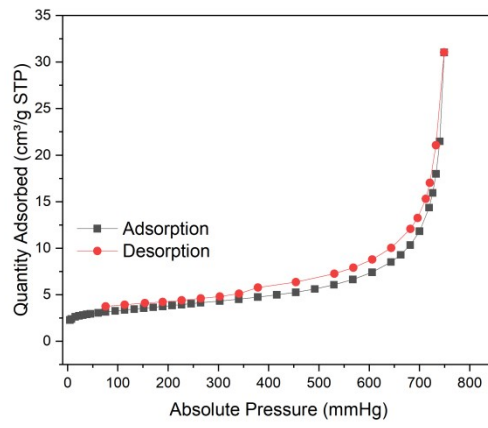

Fig. S5. N<sub>2</sub> adsorption/desorption curves of AC-4 aerogels

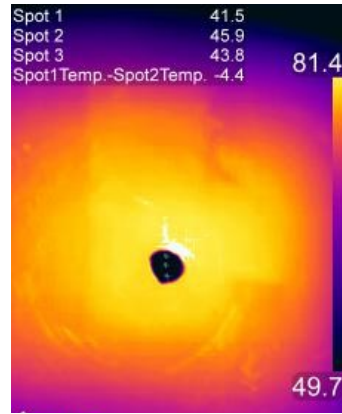

Fig. S6 SA aerogel (2%) thermal image (heating after 90S)

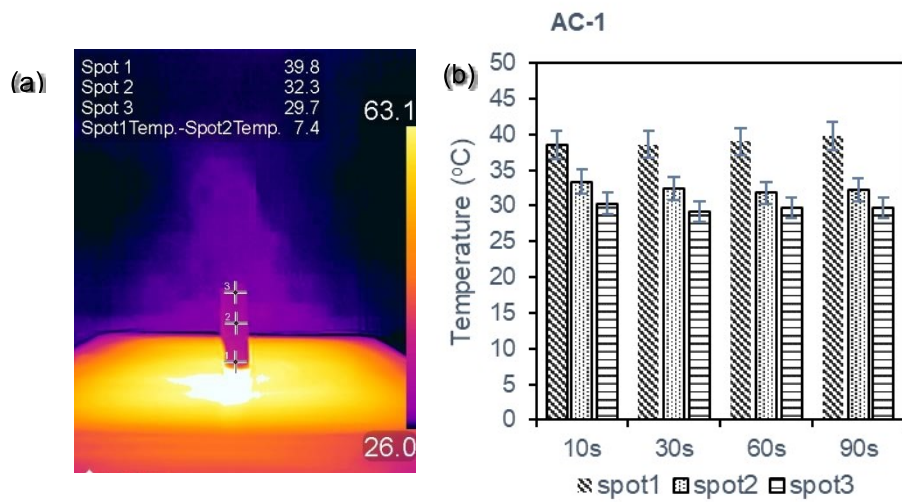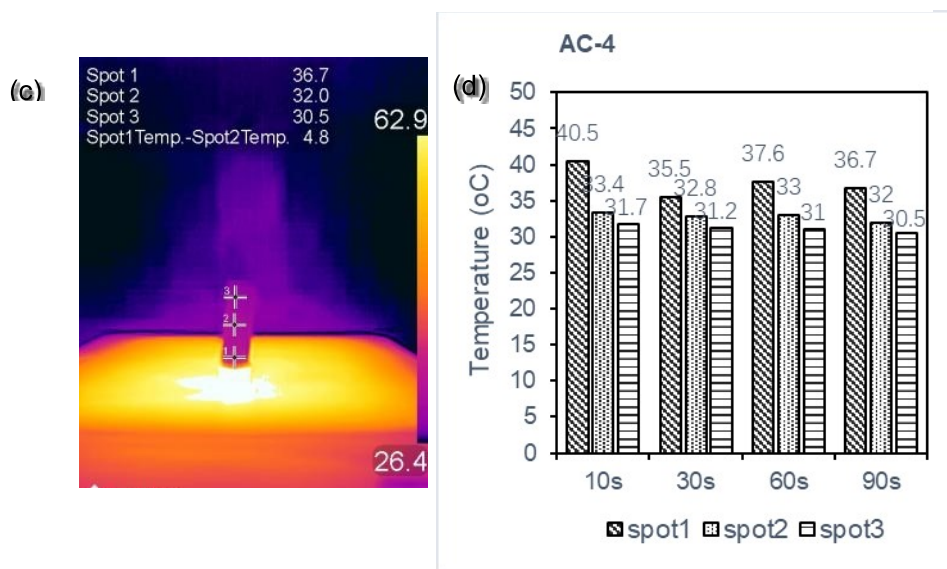

Fig. S7. Temperature changes of AC aerogels in longitudinal direction during heating for different time (a,b) AC-1 and (c,d) AC-4.
